# Supplementary material for: Whole-Genome Analysis of Staphylococcus aureus Isolates from Ready-to-Eat Food in Russia
Source: MDPI journal article supplement (doi:10.3390/foods11172574), 2022-08-25

**Figure S1.** Minimum-spanning tree (MST) of cgMLST allelic profiles for *S. aureus* isolates; if a group of the isolates possessed completely the same profiles, only one isolate from this group was shown for clarity

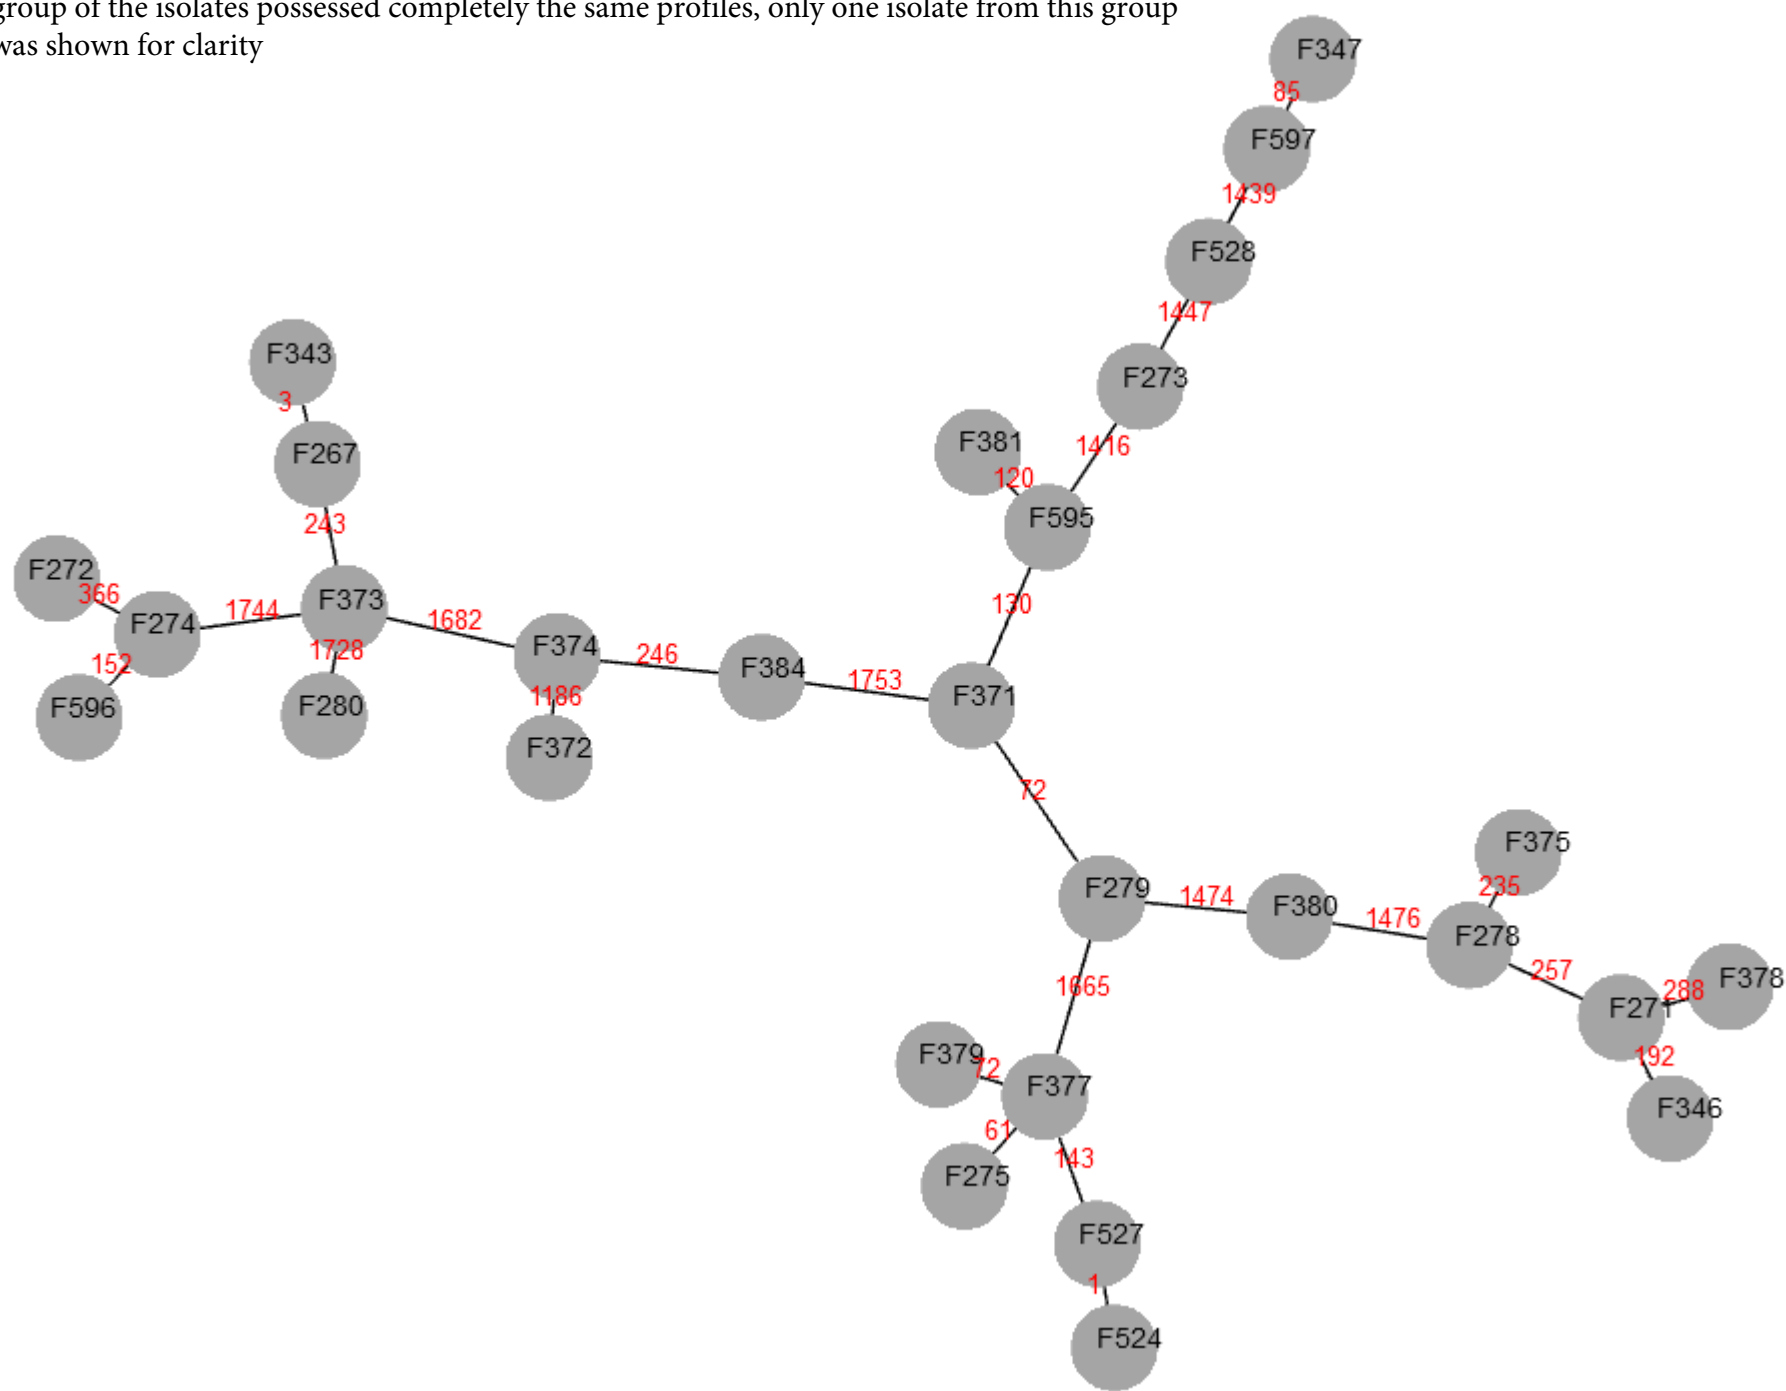

Supplement: s1 [file s1]
